# Supplementary material for: A Checklist for Assessing the Methodological Quality of Concurrent tES-fMRI Studies (ContES Checklist): A Consensus Study and Statement
Source: bioRxiv or medRxiv preprint supplement (doi:10.1101/2020.12.23.20248579), 2021-10-27
Supplement: Supplementary file [file media-2.pdf]

## Supplementary Table 6 | Concurrent tES-fMRI (ContES 2021) checklist, short form.

The ContES checklist is designed to provide a short list of the main items that every concurrent tES-fMRI study should consider in the final report/paper. These items are designed as simple questions to appraise articles with Yes or No answers. Authors could provide a filled checklist including the line/page where the item is addressed in the manuscript as a supplement in the process of manuscript submission for peer reviewed journals. Additionally, the checklist provides a list of recommendations for each item that could increase the quality of reporting. Although the checklist is designed primarily to guide the development of research reports, the items and recommendations can be considered when concurrent tES-fMRI studies are being designed as well.

| Section/topic                                            | Item No | Main Items to Report                                                                                                                                                                                           | Page/Line |
|----------------------------------------------------------|---------|----------------------------------------------------------------------------------------------------------------------------------------------------------------------------------------------------------------|-----------|
| <b>Technological Factors</b>                             |         |                                                                                                                                                                                                                |           |
| Manufacturer of MR Conditional Stimulator                | 1.1     | The brand and model (if a brand is providing different MR conditional models) for the MR conditional stimulator.                                                                                               |           |
| MR Conditional Electrode Details                         | 1.2     | The MR conditional electrode type (i.e., conductive polymer with or without a sponge or other conductive medium holders).                                                                                      |           |
| Electrode Positioning                                    | 1.3     | The method for electrode placement over the head inside the scanner (i.e., targeting software, 10-20 convention with or without EEG cap, functional targeting (fMRI), computational head models or others).    |           |
| MR Conditional Skin-Electrode Interface                  | 1.4     | The MR conditional skin-electrode interface (saline solution, conductive paste, gel, etc.).                                                                                                                    |           |
| Amount of Contact Medium (Paste/Gel/Electrolyte)         | 1.5     | The amount or thickness of medium that is used for each electrode or a method to control this confounding variable.                                                                                            |           |
| Electrode Placement Visualization                        | 1.6     | Any photo/diagram/figure to precisely visualize the electrode montage inside the scanner and make replication possible.                                                                                        |           |
| RF Filter                                                | 1.7     | The RF filtering method (stimulator device connected to the subject via penetration panel (e.g., RF filters from different brands) or connected via waveguide with RF boxes on either end).                    |           |
| Wire Routing Pattern                                     | 1.8     | Wire routing pattern (out back of bore and around the control room or straight down front of bore to control room).                                                                                            |           |
| tES-fMRI Machine Synchronization/Communication           | 1.9     | The synchronization/communication method between the tES device, the stimulus delivery PC, and the scanner.                                                                                                    |           |
| <b>Safety and Noise Tests</b>                            |         |                                                                                                                                                                                                                |           |
| MR Conditionality Specifics for tES Setting              | 2.1     | The technical specifications of the MR scanner, the applied fMRI sequences, and the used tES settings and configuration to fall within the specifics of MR conditionality based on tES manufacturer guideline. |           |
| tES-fMRI Setting Test - Safety Testing                   | 2.2     | The safety of the tES-fMRI setting.                                                                                                                                                                            |           |
| tES-fMRI Setting Test - Subjective Intolerance Reporting | 2.3     | The number of cases that have not tolerated the tES/fMRI session (even if it is zero).                                                                                                                         |           |
| tES-fMRI Setting Test - Noise/Artifact                   | 2.4     | The noise/artifact induced by the tES setting in the fMRI signal with real human subjects or phantoms before starting the study (It can be reported or referred to previous studies with the same setting).    |           |
| Impedance Testing                                        | 2.5     | Impedance monitoring (i.e. before entering the scanner room and/or in the scanner room and/or inside the scanner and/or during scanning).                                                                      |           |
| <b>Methodological Factors</b>                            |         |                                                                                                                                                                                                                |           |
| Concurrent tES-fMRI Timing                               | 3.1     | The timing of concurrent tES within the fMRI paradigm.                                                                                                                                                         |           |
| Imaging Session Timing                                   | 3.2     | The imaging events before and after concurrent tES-fMRI and respective sequences.                                                                                                                              |           |
| tES Experience Report                                    | 3.3     | The assessment of the subjective experience of receiving tES inside the scanner.                                                                                                                               |           |

\*We strongly recommend that this checklist be read in conjunction with the ContES checklist development and consensus paper. The paper should be cited when using the checklist as well.
